# Supplementary material for: Insight into the Spatial Arrangement of the Lysine Tyrosylquinone and Cu2+ in the Active Site of Lysyl Oxidase-like 2
Source: MDPI journal article supplement (doi:10.3390/ijms232213966), 2022-11-12
Supplement: s1 [file s1]

## Supporting Information

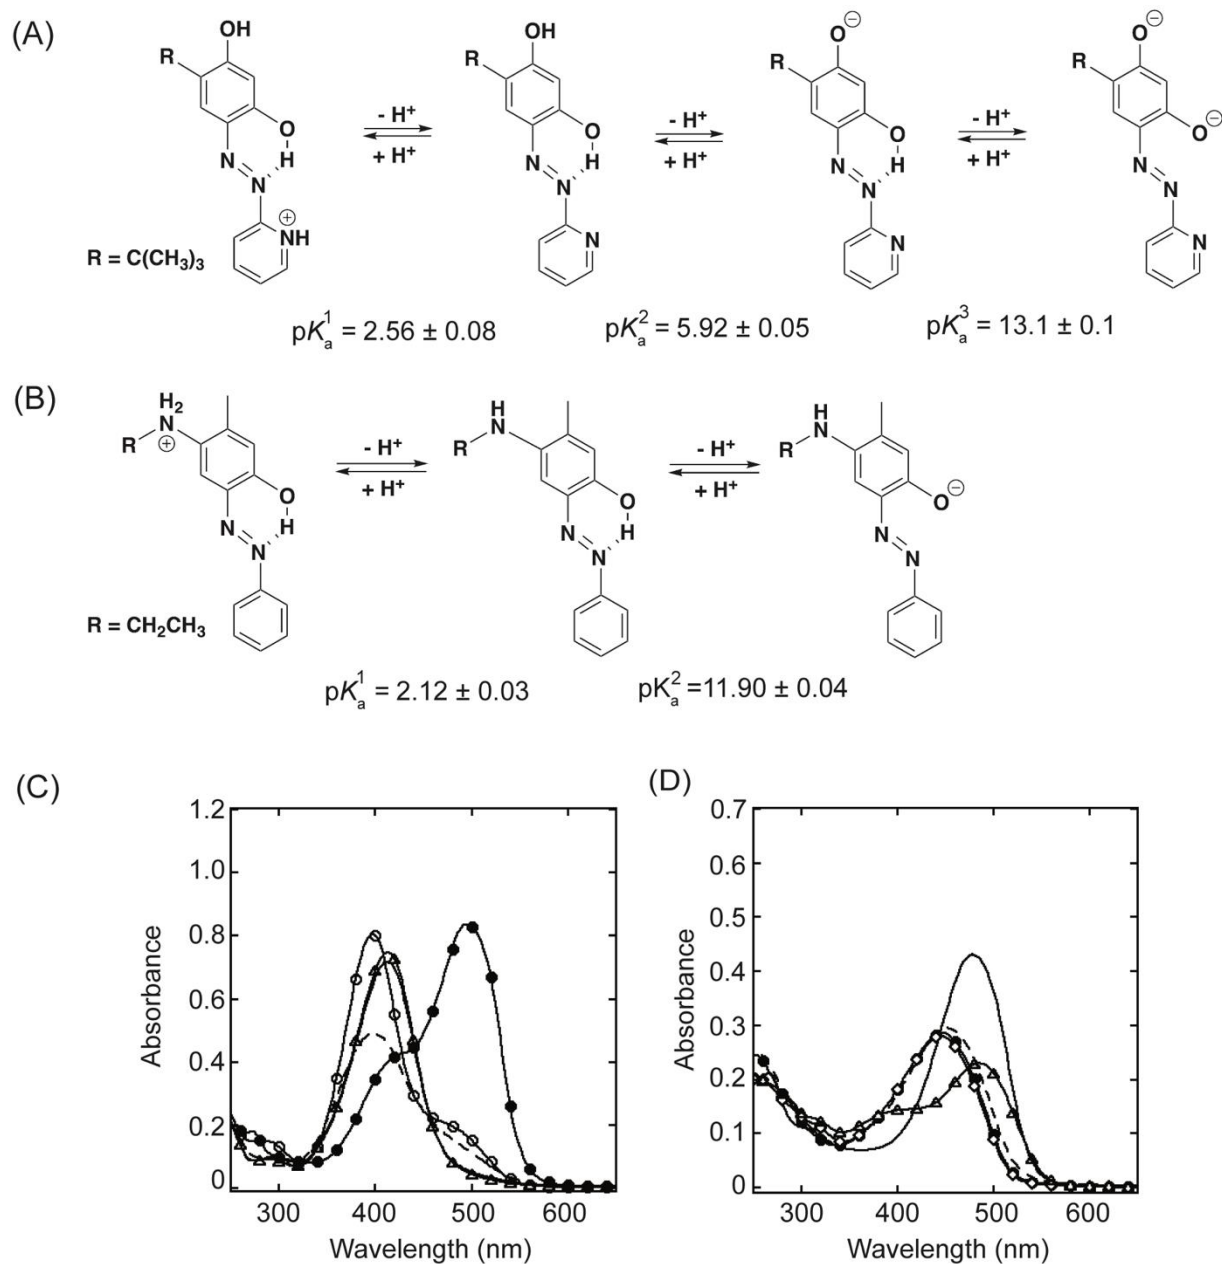

**Figure S1.**  $pK_a$ s of TPQ-2HP (A) and LTQ-PH (B) determined by spectroscopic pH titration. C) UV-vis spectra of TPQ-2HP at pH -0.33 (—○—), pH 4.38 (----), pH 7.10 (—), pH 10.16 (—△—) and pH 13.18 (—●—) [1]. D) UV-vis spectra of LTQ-PH at pH 0.23 (—○—), pH 3.11 (----), pH 7.01 (—), pH 10.00 (—△—) and pH 13.43 (—●—) [2].

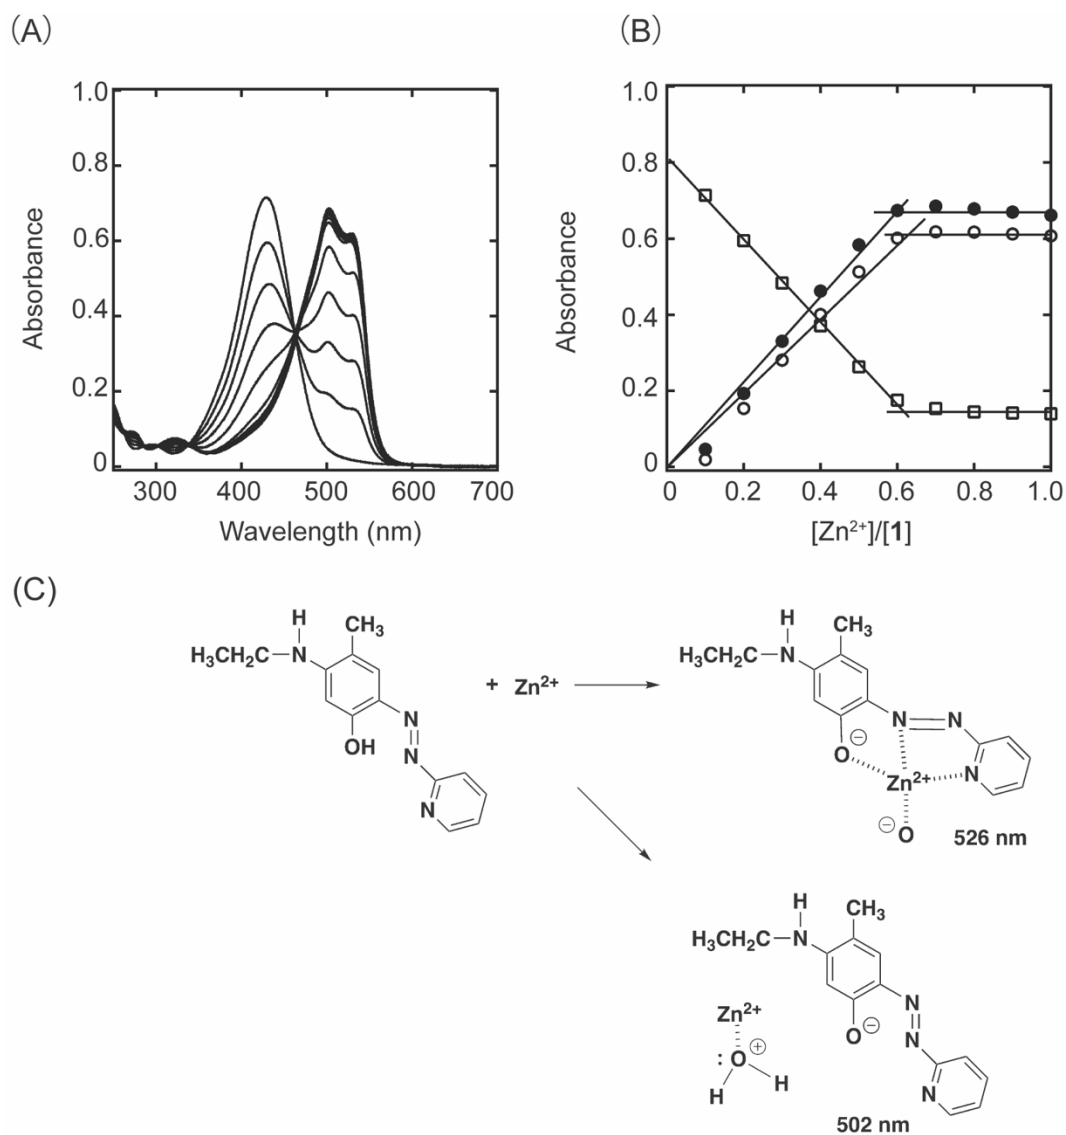

**Figure S2.** UV-vis spectroscopic titration of **1** with  $\text{Zn}^{2+}$  at pH 8.0. (A) UV-vis spectral changes observed during titration of **1** with  $\text{Zn}^{2+}$ . (B) Plot of absorbance changes at 430 (—□—), 502 (—●—), 526 nm (—○—) versus the molar ratio of  $[\text{Zn}^{2+}]/[\mathbf{1}]$ . (C) Proposed mechanism for the formation of 502 and 526 nm species.

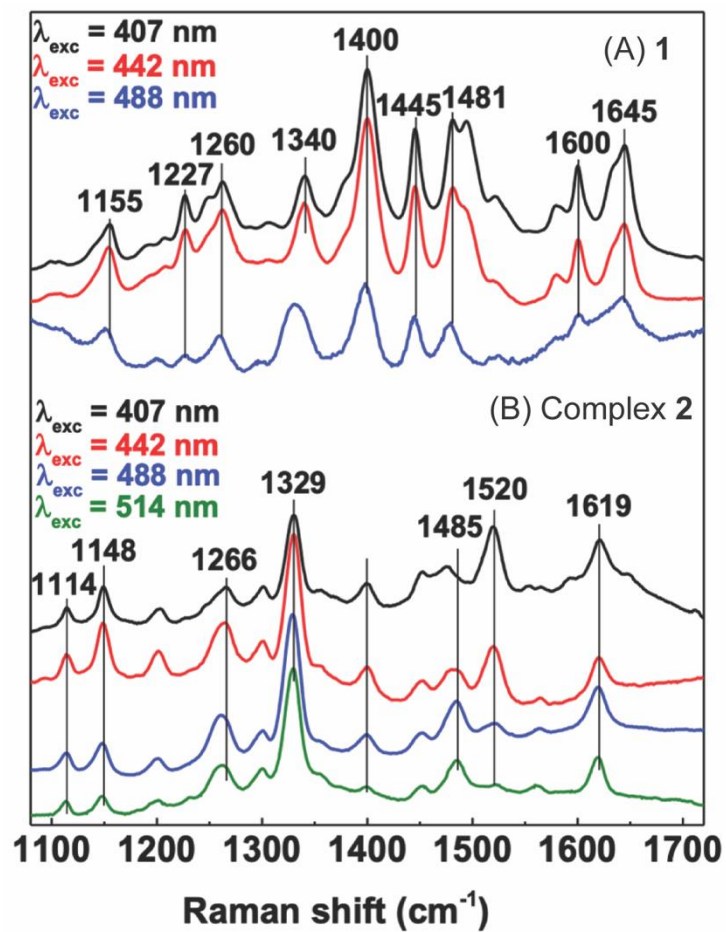

**Figure S3.** Room temperature RR spectra of **1** (A), Complex **2** (B) with varying excitation wavelength.

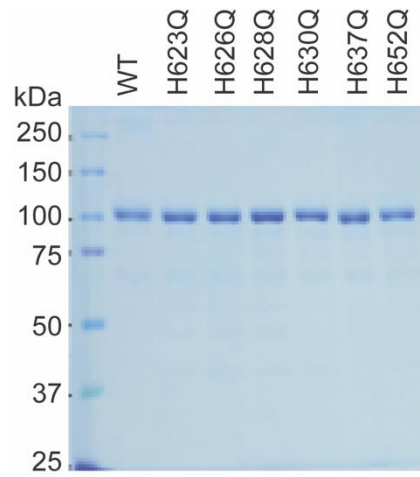

**Figure S4.** An SDS-PAGE analysis demonstrating that all mutants (H623Q, H626Q, H628Q, H630Q, H637Q, and H652Q) are secreted as WT-LOXL2.

**Table S1.** A set of primers used for site-directed mutagenesis.

| Mutant | Primer  | Sequence                              |
|--------|---------|---------------------------------------|
| H623Q  | forward | CACGCGTGGATCTGGCAGGACTGTCACAGGCAC     |
|        | reverse | GTGCCTGTGACAGTCCTGCCAGATCCACGCGTG     |
| H626Q  | forward | GATCTGGCACGACTGTCAGAGGCACTACCACAGCATG |
|        | reverse | CATGCTGTGGTAGTGCCTCTGACAGTCGTGCCAGATC |
| H628Q  | forward | GCACGACTGTCACAGGCAGTACCACAGCATGGAGGTG |
|        | reverse | CACCTCCATGCTGTGGTACTGCTGTGACAGTCGTGC  |
| H630Q  | forward | CTGTCACAGGCACTACCAGAGCATGGAGGTGTTACC  |
|        | reverse | GGTGAACACCTCCATGCTCTGGTAGTGCCTGTGACAG |
| H637Q  | forward | ATGGAGGTGTTACCCAGTATGACCTGCTGAAC      |
|        | reverse | GTTACAGAGGTCATACTGGGTGAACACCTCCAT     |
| H652Q  | forward | AAGGTGGCAGAGGGCCAGAAGGCCAGCTTCTGC     |
|        | reverse | GCAGAAGCTGGCCTTCTGCCCTCTGCCACCTT      |

**Table S2.** Acquisition parameters for EPR spectroscopy

| Compound  |             | Power (mW) | Power Attenuation (dB) | Field Center (G) | Sweep Width (G) |
|-----------|-------------|------------|------------------------|------------------|-----------------|
| Complex 3 | solid state | 2          | 20                     | 3100             | 1000.1          |
| Complex 4 | solid state | 2          | 20                     | 3100             | 1000.1          |
| Complex 3 | in DMSO     | 2          | 20                     | 2200             | 1800            |
| Complex 4 | in DMSO     | 2          | 20                     | 2200             | 1800            |

**Table S3.** g strain values in DMSO

| Compound  | g strain |
|-----------|----------|
| Complex 3 | 0.092    |
| Complex 4 | 0.080    |

## References

1. Mure, M.; Brown, D. E.; Saysell, C.; Rogers, M. S.; Wilmot, C. M.; Kurtis, C. R.; McPherson, M. J.; Phillips, S. E.; Knowles, P. F.; Dooley, D. M., Role of the interactions between the active site base and the substrate Schiff base in amine oxidase catalysis. Evidence from structural and spectroscopic studies of the 2-hydrazinopyridine adduct of Escherichia coli amine oxidase. *Biochemistry* **2005**, *44*, (5), 1568-82.
2. Mure, M.; Wang, S. X.; Klinman, J. P., Synthesis and characterization of model compounds of the lysine tyrosyl quinone cofactor of lysyl oxidase. *J Am Chem Soc* **2003**, *125*, (20), 6113-25.
